# Supplementary material for: A Multistage Very Large-Scale Neighborhood Search for the Vehicle Routing Problem with Soft Time Windows
Source: Atypon-hosted journal article supplement (doi:10.1287/trsc.2014.0558), 2015-02-27
Supplement: trsc.2014.0558-sm-appendix.pdf [file trsc.2014.0558-sm-appendix.pdf]

## Appendix A: Proof of Proposition 1

### Proof of Proposition 1

Proposition 1 can be proven by induction using inductive Hypothesis 1:

**HYPOTHESIS 1 ( $P(n)$ ).** *If  $y_l \leq z_l, \forall l \in \text{sites}(r)$ , then for any service time  $s_{r_k}$  such that  $k+n = m$  and  $y_{r_k} \leq s_{r_k} \leq z_{r_k}$ , there is a start of service time  $s_j$  for each  $j = r_{k+1}, \dots, r_{m+1}$  such that  $y_j \leq s_j \leq z_j$  and such that  $[s_{r_k}, s_{r_{k+1}}, \dots, s_{r_{m+1}}]$  respects constraints (4) to (6) with  $i = r_k, i = r_{k+1}, \dots, i = r_m$  and constraint (5) with  $i = r_{m+1}$ .*

#### Base case: $n=0$

This is the case where  $k+0 = m$ , thus customer  $r_k$  is the last customer in the route. After serving customer  $r_k$ , the vehicle will return to the depot  $r_0$  (remember we consider the successor of the last customer  $r_m$  the depot, thus  $r_{m+1} = r_0$ ). Hypothesis  $P(0)$  becomes:

If  $y_l \leq z_l, \forall l \in \text{sites}(r)$ , then for any service time  $s_{r_k}$  such that  $k = m$  and  $y_{r_k} \leq s_{r_k} \leq z_{r_k}$ , there is a start of service time  $s_{r_0}$  such that  $y_{r_0} \leq s_{r_0} \leq z_{r_0}$  and such that  $\{s_{r_k}, s_{r_{m+1}}\}$  respects constraints (4) to (6) with  $i = r_k = r_m$  and constraint (5) with  $i = r_{m+1} = r_0$ .

Suppose  $s_{r_0} = s_{r_k} + c_{r_k, r_0} + d_{r_k}$ . First we need to verify whether  $s_{r_0}$  respects  $y_{r_0} \leq s_{r_0} \leq z_{r_0}$ . It is known that  $y_{r_0} = e_{r_0}$  and  $z_{r_0} = l_{r_0}$  from (8) and (9), thus it is sufficient to verify  $e_{r_0} \leq s_{r_0} \leq l_{r_0}$ . Since  $s_{r_0} \geq s_{r_k}$  and  $s_{r_k} \geq y_{r_k}$  (by hypothesis  $P(n)$ ) and  $y_{r_k} \geq e_{r_k}$  (by definition of  $y_{r_k}$ ) and  $e_{r_k} \geq e_{r_0}$  (by problem definition) we have  $s_{r_0} \geq e_{r_0}$ . By (9) we know that

$$\begin{aligned}
 z_{r_k} & \leq z_{r_0} - c_{r_k, r_0} - d_{r_k} \\
 \Leftrightarrow z_{r_k} & \leq l_{r_0} - c_{r_k, r_0} - d_{r_k} \quad \text{from (9)} \\
 \Leftrightarrow s_{r_k} & \leq l_{r_0} - c_{r_k, r_0} - d_{r_k} \quad \text{since } s_{r_k} \leq z_{r_k} \text{ by hypothesis P(n)} \\
 \Leftrightarrow s_{r_k} + c_{r_k, r_0} + d_{r_k} & \leq l_{r_0} \\
 \Leftrightarrow s_{r_0} & \leq l_{r_0}
 \end{aligned}$$

Thus we have  $e_{r_0} \leq s_{r_0} \leq l_{r_0}$ .

Next we need to show that  $s_{r_k}$  respects Eq. (4). This is verified by definition of  $s_{r_0}$ :

$$\begin{aligned}
 \delta_{r_k} + c_{r_k, r_0} & \leq s_{r_0} \\
 \Leftrightarrow s_{r_k} + d_{r_k} + c_{r_k, r_0} & \leq s_{r_0} \quad \text{(by Eq.(2))} \\
 \Leftrightarrow s_{r_k} + d_{r_k} + c_{r_k, r_0} & \leq s_{r_k} + d_{r_k} + c_{r_k, r_0}
 \end{aligned}$$

Both  $s_{r_k}$  and  $s_{r_0}$  respect Eq. (5) since  $y_{r_k} \leq s_{r_k} \leq z_{r_k}$  and  $e_{r_k} \leq y_{r_k} \leq z_{r_k} \leq l_{r_k}$  and  $y_{r_0} \leq s_{r_0} \leq z_{r_0}$  and  $e_{r_0} \leq y_{r_0} \leq z_{r_0} \leq l_{r_0}$ .

Finally  $s_{r_k}$  respects Eq. (6) since:

$$\begin{aligned} s_{r_k} + d_{r_k} + c_{r_k, r_0} &\geq s_{r_0} - w_{max} \\ \Leftrightarrow s_{r_k} + d_{r_k} + c_{r_k, r_0} + w_{max} &\geq s_{r_k} + d_{r_k} + c_{r_k, r_0} \end{aligned}$$

Thus for any  $s_{r_k}$  s.t.  $y_{r_k} \leq s_{r_k} \leq z_{r_k}$  with  $k+0 = m$  there is a  $s_{r_0}$  such that  $\{s_{r_k}, s_{r_0}\}$  respects constraints (4) to (6) with  $i = r_k = r_m$  and constraint (5) with  $i = r_{m+1} = r_0$  and we have proven  $P(0)$ .

### Inductive step: if P(n) holds then P(n+1) holds as well

Assume that the following holds: If  $y_l \leq z_l, \forall l \in sites(r)$ , then for any service time  $s_{r_k}$  such that  $k+n = m$  and  $y_{r_k} \leq s_{r_k} \leq z_{r_k}$ , there is a start of service time  $s_j$  for each  $j = r_{k+1}, \dots, r_{m+1}$  such that  $y_j \leq s_j \leq z_j$  and such that  $\{s_{r_k}, s_{r_{k+1}}, \dots, s_{r_{m+1}}\}$  respects constraints (4) to (6) with  $i = r_k, i = r_{k+1}, \dots, i = r_m$  and constraint (5) with  $i = r_{m+1} = r_0$ .

We need to show that if  $y_l \leq z_l, \forall l \in sites(r)$ , then for any service time  $s_{r_{k-1}}$  such that  $k-1+n+1 = m$  and  $y_{r_{k-1}} \leq s_{r_{k-1}} \leq z_{r_{k-1}}$ , there is a start of service time  $s_j$  for each  $j = r_k, \dots, r_{m+1}$  such that  $y_j \leq s_j \leq z_j$  and such that  $\{s_{r_{k-1}}, s_{r_k}, \dots, s_{r_{m+1}}\}$  respects constraints (4) to (6) with  $i = r_{k-1}, i = r_k, \dots, i = r_m$  and constraint (5) with  $i = r_{m+1} = r_0$ .

Given  $P(n)$  it is sufficient to show that for any  $s_{r_{k-1}}$  such that  $y_{r_{k-1}} \leq s_{r_{k-1}} \leq z_{r_{k-1}}$  there is a  $s_{r_k}$  such that  $y_{r_k} \leq s_{r_k} \leq z_{r_k}$  and such that  $s_{r_{k-1}}$  and  $s_{r_k}$  respect Constraints (4) to (6) with  $i = k-1$  and  $i = k$ .

Assume some  $s_{r_{k-1}}$  such that  $y_{r_{k-1}} \leq s_{r_{k-1}} \leq z_{r_{k-1}}$  and some  $s_{r_k}$  such that  $y_{r_k} \leq s_{r_k} \leq z_{r_k}$ . Then the following hold:

$$\begin{aligned} y_{r_{k-1}} &\geq y_{r_k} - c_{r_{k-1}, r_k} - d_{r_{k-1}} - w_{max} \quad \text{by Eq. (8)} \\ \Leftrightarrow y_{r_k} &\leq y_{r_{k-1}} + c_{r_{k-1}, r_k} + d_{r_{k-1}} + w_{max} \\ \Leftrightarrow y_{r_k} &\leq s_{r_{k-1}} + c_{r_{k-1}, r_k} + d_{r_{k-1}} + w_{max} \quad \text{since } s_{r_{k-1}} \geq y_{r_{k-1}} \end{aligned}$$

and

$$\begin{aligned} z_{r_{k-1}} &\leq z_{r_k} - c_{r_{k-1}, r_k} - d_{r_{k-1}} \quad \text{by Eq. (9)} \\ \Leftrightarrow z_{r_k} &\geq z_{r_{k-1}} + c_{r_{k-1}, r_k} + d_{r_{k-1}} \\ \Leftrightarrow z_{r_k} &\geq s_{r_{k-1}} + c_{r_{k-1}, r_k} + d_{r_{k-1}} \quad \text{since } s_{r_{k-1}} \leq z_{r_{k-1}} \end{aligned}$$

Also, in order for  $s_{r_{k-1}}$  to respect Eqs. (4) and (6) the following must hold:

$$s_{r_{k-1}} + d_{r_{k-1}} + c_{r_{k-1},r_k} \leq s_{r_k} \leq s_{r_{k-1}} + d_{r_{k-1}} + c_{r_{k-1},r_k} + w_{max}$$

Therefore a start of service time  $s_{r_k}$  such that  $y_{r_k} \leq s_{r_k} \leq z_{r_k}$  and such that Eqs. (4) and (6) are respected must lie in the interval:

$$[\max(y_{r_k}, s_{r_{k-1}} + d_{r_{k-1}} + c_{r_{k-1},r_k}); \min(z_{r_k}, s_{r_{k-1}} + d_{r_{k-1}} + c_{r_{k-1},r_k} + w_{max})]$$

Since  $y_{r_k} \leq s_{r_{k-1}} + c_{r_{k-1},r_k} + d_{r_{k-1}} + w_{max}$  and  $z_{r_k} \geq s_{r_{k-1}} + c_{r_{k-1},r_k} + d_{r_{k-1}}$  as shown previously and since  $y_{r_k} \leq z_{r_k}$  this interval is non-empty. Since  $e_{r_k} \leq y_{r_k} \leq z_{r_k} \leq l_{r_k}$  a start of service time  $s_{r_k}$  in this interval also respects Eq. (5).

Finally, if  $s_{r_k}$  lies in this interval then  $s_{r_{k-1}}$  respects Eqs. (4) to (6) since:

- $s_{r_{k-1}} + d_{r_{k-1}} + c_{r_{k-1},r_k} \leq \max(y_{r_k}, s_{r_{k-1}} + d_{r_{k-1}} + c_{r_{k-1},r_k})$   
(Eq. (4) holds with  $i = r_{k-1}$ )
- $s_{r_{k-1}} + d_{r_{k-1}} + c_{r_{k-1},r_k} + w_{max} \geq \min(z_{r_k}, s_{r_{k-1}} + d_{r_{k-1}} + c_{r_{k-1},r_k} + w_{max})$   
(Eq. (6) holds with  $i = r_{k-1}$ )
- $e_{r_{k-1}} \leq y_{r_{k-1}} \leq s_{r_{k-1}} \leq z_{r_{k-1}} \leq l_{r_{k-1}}$   
(Eq. (5) holds with  $i = r_{k-1}$ )

This shows that if  $y_l \leq z_l, \forall l \in \text{sites}(r)$ , then for any service time  $s_{r_k}$  such that  $y_{r_k} \leq s_{r_k} \leq z_{r_k}$ , there is a start of service time  $s_j$  for each  $j = r_{k+1}, \dots, r_m$  such that  $y_j \leq s_j \leq z_j$  and such that  $\{s_{r_k}, s_{r_{k+1}}, \dots, s_{r_{m+1}}\}$  respects constraints (4) to (6) with  $i = r_k, i = r_{k+1}, \dots, i = r_m$  and constraint (5) with  $i = r_{m+1} = r_0$ . ■

## Appendix B: Additional Results

Table 4 Type 3, problem set C1

| $p_{\max}$ | $w_{\max}$ | Instance | $K/Dist.$ | $Non-viol.$<br>$TW (\%)$ | $sec_{it}$ (sec) |
|------------|------------|----------|-----------|--------------------------|------------------|
| 5%         | 5%         | C101     | 11/867    | 99                       | 487              |
|            |            | C102     | 10/1076   | 100                      | 776              |
|            |            | C103     | 10/1092   | 100                      | 909              |
|            |            | C104     | 10/1009   | 100                      | 1103             |
|            |            | C105     | 10/871    | 100                      | 577              |
|            |            | C106     | 10/880    | 100                      | 568              |
|            |            | C107     | 10/865    | 100                      | 632              |
|            |            | C108     | 11/957    | 100                      | 719              |
|            |            | C109     | 10/897    | 100                      | 897              |
| 5%         | 10%        | C101     | 11/901    | 100                      | 520              |
|            |            | C102     | 10/922    | 100                      | 732              |
|            |            | C103     | 10/1036   | 100                      | 944              |
|            |            | C104     | 10/971    | 100                      | 1089             |
|            |            | C105     | 10/829    | 100                      | 568              |
|            |            | C106     | 10/851    | 100                      | 572              |
|            |            | C107     | 10/869    | 100                      | 638              |
|            |            | C108     | 11/895    | 100                      | 735              |
|            |            | C109     | 10/868    | 100                      | 890              |
| 10%        | 5%         | C101     | 10/831    | 98                       | 591              |
|            |            | C102     | 10/1131   | 100                      | 862              |
|            |            | C103     | 10/1010   | 100                      | 1082             |
|            |            | C104     | 10/985    | 100                      | 1235             |
|            |            | C105     | 10/871    | 100                      | 714              |
|            |            | C106     | 11/972    | 100                      | 733              |
|            |            | C107     | 10/869    | 98                       | 803              |
|            |            | C108     | 11/902    | 100                      | 850              |
|            |            | C109     | 10/888    | 100                      | 1041             |
| 10%        | 10%        | C101     | 10/935    | 99                       | 631              |
|            |            | C102     | 10/1019   | 100                      | 871              |
|            |            | C103     | 10/865    | 100                      | 1159             |
|            |            | C104     | 10/972    | 100                      | 1270             |
|            |            | C105     | 11/907    | 100                      | 704              |
|            |            | C106     | 11/926    | 100                      | 747              |
|            |            | C107     | 10/842    | 97                       | 785              |
|            |            | C108     | 11/917    | 100                      | 888              |
|            |            | C109     | 10/936    | 100                      | 1079             |

**Table 5** Type 4,  $p_{max} = 5\%$ 

| Instance | $K/Dist.$ | Non-viol.<br>$TW(\%)$ | $sec_{it}$ (sec) |
|----------|-----------|-----------------------|------------------|
| R101     | 15/1599   | 84                    | 346              |
| R102     | 13/1530   | 86                    | 406              |
| R103     | 11/1246   | 95                    | 445              |
| R104     | 10/1097   | 100                   | 484              |
| R105     | 12/1434   | 83                    | 358              |
| R106     | 11/1323   | 94                    | 392              |
| R107     | 10/1191   | 97                    | 415              |
| R108     | 9/1037    | 98                    | 490              |
| R109     | 11/1248   | 95                    | 378              |
| R110     | 10/1203   | 91                    | 404              |
| R111     | 10/1206   | 97                    | 406              |
| R112     | 10/1036   | 100                   | 461              |
| C101     | 10/829    | 100                   | 467              |
| C102     | 10/842    | 100                   | 702              |
| C103     | 11/882    | 100                   | 866              |
| C104     | 10/917    | 100                   | 954              |
| C105     | 10/869    | 100                   | 522              |
| C106     | 10/831    | 100                   | 536              |
| C107     | 10/879    | 100                   | 574              |
| C108     | 10/868    | 100                   | 680              |
| C109     | 10/904    | 100                   | 789              |
| RC101    | 13/1668   | 86                    | 323              |
| RC102    | 12/1593   | 96                    | 380              |
| RC103    | 11/1344   | 98                    | 393              |
| RC104    | 10/1229   | 100                   | 428              |
| RC105    | 12/1611   | 91                    | 344              |
| RC106    | 11/1466   | 96                    | 351              |
| RC107    | 11/1373   | 100                   | 386              |
| RC108    | 10/1267   | 99                    | 396              |
| R201     | 4/1390    | 100                   | 2702             |
| R202     | 3/1296    | 98                    | 4729             |
| R203     | 3/1079    | 100                   | 7889             |
| R204     | 3/841     | 100                   | 9218             |
| R205     | 3/1170    | 100                   | 4427             |
| R206     | 3/1033    | 100                   | 5745             |
| R207     | 3/980     | 100                   | 7445             |
| R208     | 2/928     | 100                   | 8392             |
| R209     | 3/1078    | 100                   | 4880             |
| R210     | 3/1038    | 99                    | 5792             |
| R211     | 3/884     | 100                   | 6306             |
| C201     | 3/591     | 100                   | 1957             |
| C202     | 3/591     | 100                   | 3976             |
| C203     | 4/673     | 100                   | 5528             |
| C204     | 4/731     | 100                   | 6854             |
| C205     | 3/589     | 100                   | 1789             |
| C206     | 3/589     | 100                   | 1934             |
| C207     | 3/589     | 100                   | 2116             |
| C208     | 3/591     | 100                   | 2441             |
| RC201    | 4/1600    | 97                    | 2527             |
| RC202    | 4/1384    | 99                    | 3083             |
| RC203    | 3/1269    | 100                   | 5794             |
| RC204    | 3/951     | 100                   | 6867             |
| RC205    | 4/1391    | 97                    | 2913             |
| RC206    | 4/1303    | 100                   | 3229             |
| RC207    | 4/1233    | 100                   | 3478             |
| RC208    | 3/1014    | 100                   | 4255             |

**Table 6** Type 4,  $p_{max} = 10\%$ 

| Instance | $K/Dist.$ | Non-viol.<br>$TW(\%)$ | $sec_{it}$ (sec) |
|----------|-----------|-----------------------|------------------|
| R101     | 13/1485   | 62                    | 342              |
| R102     | 12/1349   | 81                    | 393              |
| R103     | 10/1184   | 84                    | 421              |
| R104     | 10/1078   | 100                   | 476              |
| R105     | 12/1377   | 83                    | 366              |
| R106     | 11/1262   | 92                    | 405              |
| R107     | 10/1132   | 93                    | 427              |
| R108     | 9/1018    | 99                    | 434              |
| R109     | 11/1254   | 97                    | 392              |
| R110     | 10/1187   | 94                    | 397              |
| R111     | 10/1154   | 95                    | 416              |
| R112     | 10/1031   | 100                   | 457              |
| C101     | 10/910    | 97                    | 525              |
| C102     | 10/1133   | 100                   | 706              |
| C103     | 10/1065   | 100                   | 925              |
| C104     | 10/939    | 100                   | 1150             |
| C105     | 10/869    | 100                   | 607              |
| C106     | 10/878    | 100                   | 621              |
| C107     | 10/913    | 99                    | 646              |
| C108     | 10/871    | 100                   | 750              |
| C109     | 10/870    | 100                   | 899              |
| RC101    | 12/1635   | 75                    | 337              |
| RC102    | 11/1473   | 85                    | 363              |
| RC103    | 10/1316   | 89                    | 385              |
| RC104    | 10/1269   | 100                   | 443              |
| RC105    | 12/1585   | 89                    | 355              |
| RC106    | 11/1441   | 91                    | 347              |
| RC107    | 10/1322   | 85                    | 411              |
| RC108    | 10/1245   | 100                   | 384              |
| R201     | 4/1333    | 96                    | 3328             |
| R202     | 3/1244    | 95                    | 4745             |
| R203     | 3/1055    | 98                    | 7582             |
| R204     | 3/916     | 100                   | 10398            |
| R205     | 3/1132    | 99                    | 5407             |
| R206     | 3/1035    | 100                   | 6842             |
| R207     | 3/959     | 100                   | 8711             |
| R208     | 2/832     | 100                   | 9950             |
| R209     | 3/1001    | 99                    | 5945             |
| R210     | 3/1076    | 100                   | 6825             |
| R211     | 3/865     | 100                   | 7937             |
| C201     | 3/591     | 100                   | 2116             |
| C202     | 4/687     | 99                    | 5421             |
| C203     | 4/752     | 100                   | 6674             |
| C204     | 4/725     | 100                   | 7241             |
| C205     | 3/590     | 100                   | 2563             |
| C206     | 3/589     | 100                   | 2156             |
| C207     | 3/592     | 100                   | 2029             |
| C208     | 3/592     | 100                   | 2313             |
| RC201    | 4/1536    | 94                    | 2523             |
| RC202    | 3/1375    | 94                    | 3467             |
| RC203    | 3/1165    | 98                    | 5097             |
| RC204    | 3/979     | 100                   | 7146             |
| RC205    | 4/1507    | 96                    | 3192             |
| RC206    | 3/1291    | 98                    | 3338             |
| RC207    | 4/1201    | 99                    | 4043             |
| RC208    | 3/1069    | 100                   | 5469             |

**Table 7** Type 5,  $p_{max} = 5\%$ 

| Instance | $K/Dist.$ | Non-viol.<br>$TW(\%)$ | $sec_{it}$ (sec) |
|----------|-----------|-----------------------|------------------|
| R101     | 14/1574   | 64                    | 353              |
| R102     | 12/1432   | 76                    | 439              |
| R103     | 10/1241   | 68                    | 429              |
| R104     | 9/1025    | 90                    | 476              |
| R105     | 12/1411   | 74                    | 364              |
| R106     | 11/1312   | 93                    | 409              |
| R107     | 10/1166   | 97                    | 430              |
| R108     | 9/1043    | 96                    | 456              |
| R109     | 11/1261   | 92                    | 404              |
| R110     | 10/1197   | 93                    | 399              |
| R111     | 10/1179   | 94                    | 414              |
| R112     | 10/1047   | 100                   | 472              |
| C101     | 10/829    | 100                   | 498              |
| C102     | 10/940    | 100                   | 758              |
| C103     | 10/954    | 100                   | 923              |
| C104     | 10/931    | 100                   | 1125             |
| C105     | 10/875    | 100                   | 544              |
| C106     | 10/839    | 100                   | 595              |
| C107     | 10/868    | 100                   | 630              |
| C108     | 10/842    | 100                   | 727              |
| C109     | 10/896    | 100                   | 883              |
| RC101    | 12/1578   | 69                    | 332              |
| RC102    | 11/1507   | 76                    | 361              |
| RC103    | 10/1298   | 88                    | 398              |
| RC104    | 10/1227   | 99                    | 523              |
| RC105    | 11/1483   | 70                    | 349              |
| RC106    | 11/1463   | 86                    | 363              |
| RC107    | 11/1384   | 98                    | 394              |
| RC108    | 10/1229   | 98                    | 395              |
| R201     | 4/1376    | 98                    | 3442             |
| R202     | 3/1394    | 94                    | 5059             |
| R203     | 3/1125    | 100                   | 8760             |
| R204     | 3/826     | 100                   | 11747            |
| R205     | 3/1140    | 99                    | 5165             |
| R206     | 3/1050    | 100                   | 7053             |
| R207     | 3/961     | 100                   | 8660             |
| R208     | 3/790     | 100                   | 10771            |
| R209     | 3/1030    | 100                   | 6974             |
| R210     | 3/1212    | 100                   | 7407             |
| R211     | 3/928     | 100                   | 7913             |
| C201     | 3/591     | 100                   | 1814             |
| C202     | 4/626     | 100                   | 4462             |
| C203     | 4/667     | 100                   | 6213             |
| C204     | 3/683     | 100                   | 7255             |
| C205     | 3/591     | 100                   | 1755             |
| C206     | 3/594     | 100                   | 1985             |
| C207     | 3/598     | 100                   | 2100             |
| C208     | 3/605     | 100                   | 2250             |
| RC201    | 4/1594    | 95                    | 2440             |
| RC202    | 4/1340    | 98                    | 4510             |
| RC203    | 4/1162    | 100                   | 5764             |
| RC204    | 3/921     | 100                   | 7018             |
| RC205    | 4/1374    | 96                    | 3248             |
| RC206    | 4/1340    | 100                   | 3868             |
| RC207    | 3/1214    | 99                    | 4099             |
| RC208    | 3/1006    | 100                   | 5571             |

**Table 8** Type 5,  $p_{max} = 10\%$ 

| Instance | $K/Dist.$ | Non-viol.<br>$TW(\%)$ | $sec_{it}$ (sec) |
|----------|-----------|-----------------------|------------------|
| R101     | 12/1445   | 45                    | 377              |
| R102     | 11/1333   | 68                    | 413              |
| R103     | 10/1168   | 79                    | 409              |
| R104     | 9/1018    | 88                    | 443              |
| R105     | 11/1262   | 62                    | 374              |
| R106     | 10/1245   | 73                    | 392              |
| R107     | 10/1107   | 91                    | 428              |
| R108     | 9/996     | 98                    | 440              |
| R109     | 10/1185   | 78                    | 396              |
| R110     | 10/1187   | 91                    | 401              |
| R111     | 10/1061   | 93                    | 460              |
| R112     | 9/990     | 93                    | 433              |
| C101     | 10/863    | 98                    | 626              |
| C102     | 10/865    | 100                   | 891              |
| C103     | 10/912    | 100                   | 1126             |
| C104     | 10/938    | 100                   | 1305             |
| C105     | 10/829    | 100                   | 723              |
| C106     | 10/876    | 100                   | 786              |
| C107     | 10/862    | 100                   | 811              |
| C108     | 11/876    | 100                   | 921              |
| C109     | 10/863    | 100                   | 1044             |
| RC101    | 11/1467   | 52                    | 363              |
| RC102    | 11/1486   | 84                    | 367              |
| RC103    | 10/1293   | 88                    | 397              |
| RC104    | 10/1221   | 97                    | 436              |
| RC105    | 11/1420   | 77                    | 354              |
| RC106    | 11/1385   | 86                    | 395              |
| RC107    | 10/1333   | 88                    | 396              |
| RC108    | 10/1244   | 96                    | 407              |
| R201     | 3/1402    | 83                    | 3639             |
| R202     | 3/1301    | 94                    | 6586             |
| R203     | 3/1061    | 97                    | 9683             |
| R204     | 3/844     | 100                   | 11660            |
| R205     | 3/1152    | 100                   | 6315             |
| R206     | 3/1040    | 100                   | 9322             |
| R207     | 3/918     | 99                    | 11647            |
| R208     | 3/771     | 100                   | 9994             |
| R209     | 3/1082    | 100                   | 8240             |
| R210     | 3/1062    | 99                    | 10096            |
| R211     | 3/868     | 100                   | 11241            |
| C201     | 3/591     | 100                   | 2087             |
| C202     | 4/676     | 100                   | 6693             |
| C203     | 4/715     | 100                   | 6688             |
| C204     | 3/805     | 99                    | 6469             |
| C205     | 3/589     | 100                   | 2012             |
| C206     | 3/591     | 100                   | 2521             |
| C207     | 3/622     | 100                   | 3275             |
| C208     | 3/632     | 100                   | 4848             |
| RC201    | 4/1602    | 91                    | 3286             |
| RC202    | 3/1357    | 95                    | 4400             |
| RC203    | 3/1191    | 96                    | 6493             |
| RC204    | 3/1001    | 99                    | 9705             |
| RC205    | 3/1379    | 86                    | 3599             |
| RC206    | 3/1273    | 95                    | 4003             |
| RC207    | 3/1311    | 95                    | 5299             |
| RC208    | 3/1091    | 100                   | 7959             |

**Table 9** Type 6,  $p_{max} = 5\%$ 

| Instance | $K/Dist.$ | Non-viol.<br>$TW(\%)$ | $sec_{it}$ (sec) |
|----------|-----------|-----------------------|------------------|
| R101     | 14/1555   | 64                    | 343              |
| R102     | 12/1399   | 78                    | 393              |
| R103     | 10/1252   | 79                    | 417              |
| R104     | 10/1069   | 98                    | 473              |
| R105     | 12/1412   | 78                    | 354              |
| R106     | 11/1324   | 91                    | 415              |
| R107     | 10/1202   | 95                    | 419              |
| R108     | 9/1027    | 97                    | 483              |
| R109     | 11/1231   | 92                    | 448              |
| R110     | 10/1206   | 91                    | 405              |
| R111     | 10/1179   | 94                    | 428              |
| R112     | 10/1047   | 100                   | 509              |
| C101     | 10/829    | 100                   | 506              |
| C102     | 10/951    | 100                   | 764              |
| C103     | 10/999    | 100                   | 890              |
| C104     | 10/964    | 100                   | 1078             |
| C105     | 10/829    | 100                   | 563              |
| C106     | 10/841    | 100                   | 555              |
| C107     | 10/898    | 100                   | 628              |
| C108     | 10/837    | 100                   | 766              |
| C109     | 11/891    | 100                   | 899              |
| RC101    | 12/1549   | 66                    | 333              |
| RC102    | 11/1509   | 79                    | 367              |
| RC103    | 10/1267   | 90                    | 396              |
| RC104    | 10/1220   | 100                   | 425              |
| RC105    | 11/1508   | 73                    | 351              |
| RC106    | 11/1451   | 93                    | 361              |
| RC107    | 10/1277   | 87                    | 385              |
| RC108    | 10/1256   | 98                    | 389              |
| R201     | 4/1391    | 98                    | 3205             |
| R202     | 3/1262    | 93                    | 5346             |
| R203     | 3/1046    | 99                    | 8978             |
| R204     | 3/858     | 100                   | 10569            |
| R205     | 4/1081    | 100                   | 4933             |
| R206     | 3/1121    | 100                   | 6960             |
| R207     | 3/940     | 100                   | 8901             |
| R208     | 3/808     | 100                   | 8506             |
| R209     | 3/1023    | 100                   | 6753             |
| R210     | 3/1092    | 100                   | 7459             |
| R211     | 3/883     | 100                   | 8504             |
| C201     | 3/591     | 100                   | 1859             |
| C202     | 3/618     | 100                   | 4015             |
| C203     | 4/679     | 100                   | 6846             |
| C204     | 4/769     | 100                   | 6417             |
| C205     | 3/598     | 100                   | 1941             |
| C206     | 3/600     | 100                   | 1866             |
| C207     | 3/594     | 100                   | 2063             |
| C208     | 3/600     | 100                   | 2272             |
| RC201    | 4/1539    | 97                    | 2252             |
| RC202    | 4/1427    | 98                    | 3838             |
| RC203    | 4/1162    | 100                   | 5983             |
| RC204    | 3/979     | 99                    | 7027             |
| RC205    | 4/1495    | 95                    | 3254             |
| RC206    | 4/1357    | 100                   | 3860             |
| RC207    | 3/1362    | 100                   | 4230             |
| RC208    | 3/994     | 100                   | 5598             |

**Table 10** Type 6,  $p_{max} = 10\%$ 

| Instance | $K/Dist.$ | Non-viol.<br>$TW(\%)$ | $sec_{it}$ (sec) |
|----------|-----------|-----------------------|------------------|
| R101     | 12/1446   | 47                    | 359              |
| R102     | 11/1290   | 65                    | 424              |
| R103     | 10/1158   | 82                    | 414              |
| R104     | 9/1014    | 90                    | 421              |
| R105     | 11/1328   | 67                    | 379              |
| R106     | 10/1182   | 78                    | 412              |
| R107     | 10/1126   | 92                    | 453              |
| R108     | 9/1003    | 97                    | 462              |
| R109     | 10/1188   | 78                    | 396              |
| R110     | 10/1122   | 91                    | 422              |
| R111     | 9/1008    | 70                    | 435              |
| R112     | 9/1023    | 95                    | 497              |
| C101     | 10/837    | 96                    | 633              |
| C102     | 10/964    | 99                    | 819              |
| C103     | 10/1003   | 100                   | 1110             |
| C104     | 10/975    | 100                   | 1229             |
| C105     | 10/830    | 98                    | 714              |
| C106     | 10/834    | 100                   | 717              |
| C107     | 10/883    | 98                    | 771              |
| C108     | 10/871    | 99                    | 897              |
| C109     | 10/917    | 100                   | 1006             |
| RC101    | 11/1471   | 58                    | 353              |
| RC102    | 11/1446   | 86                    | 375              |
| RC103    | 10/1279   | 90                    | 389              |
| RC104    | 10/1205   | 98                    | 456              |
| RC105    | 11/1498   | 80                    | 363              |
| RC106    | 10/1305   | 73                    | 380              |
| RC107    | 10/1309   | 85                    | 380              |
| RC108    | 10/1239   | 97                    | 445              |
| R201     | 3/1439    | 86                    | 3864             |
| R202     | 3/1172    | 92                    | 6476             |
| R203     | 3/1020    | 97                    | 10234            |
| R204     | 3/859     | 100                   | 11787            |
| R205     | 3/1151    | 100                   | 7167             |
| R206     | 3/1041    | 98                    | 8291             |
| R207     | 3/968     | 99                    | 10296            |
| R208     | 2/854     | 97                    | 10898            |
| R209     | 3/1076    | 99                    | 7631             |
| R210     | 3/1060    | 98                    | 9677             |
| R211     | 3/866     | 100                   | 10049            |
| C201     | 3/591     | 100                   | 2276             |
| C202     | 4/681     | 100                   | 5774             |
| C203     | 4/758     | 100                   | 6830             |
| C204     | 3/805     | 100                   | 6046             |
| C205     | 3/589     | 100                   | 2400             |
| C206     | 3/612     | 100                   | 2353             |
| C207     | 3/667     | 100                   | 3044             |
| C208     | 3/721     | 100                   | 5183             |
| RC201    | 4/1504    | 90                    | 3470             |
| RC202    | 3/1387    | 89                    | 4174             |
| RC203    | 3/1251    | 96                    | 6613             |
| RC204    | 3/934     | 100                   | 9229             |
| RC205    | 3/1362    | 87                    | 3651             |
| RC206    | 3/1409    | 99                    | 4348             |
| RC207    | 3/1285    | 98                    | 5690             |
| RC208    | 3/1047    | 100                   | 7529             |
